# Supplementary material for: Synthesis of core–shell structured Ag3PO4@benzoxazine soft gel nanocomposites and their photocatalytic performance
Source: Royal Society of Chemistry journal article supplement (doi:10.1039/c6ra06946k), 2016-01-01
Supplement: c6ra06946k1.pdf [file c6ra06946k1.pdf]

## Supporting Information

### Synthesis of Core-Shell Structured $\text{Ag}_3\text{PO}_4$ @Benzoxazine Soft

#### Gel Nanocomposites and their Photocatalytic Performance

Yue Hu, Shaping Huang, Xinsheng Zheng\*, Feifei Cao\*, Ting Yu, Geng Zhang,  
Zhidong Xiao, Jiangong Liang, Yichi Zhang

*Department of Chemistry, College of Science, Huazhong Agricultural University, Wuhan 430070, P. R. China.*

#### Corresponding Author:

Email: xszheng@mail.hzau.edu.cn; caoifeifei@mail.hzau.edu.cn

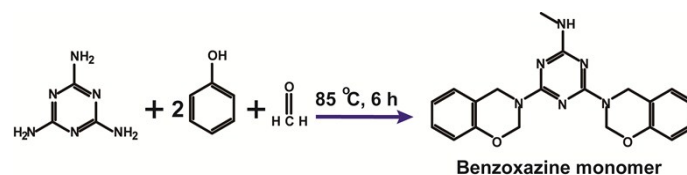

Fig. S1 Synthetic procedure for the benzoxazine monomer.

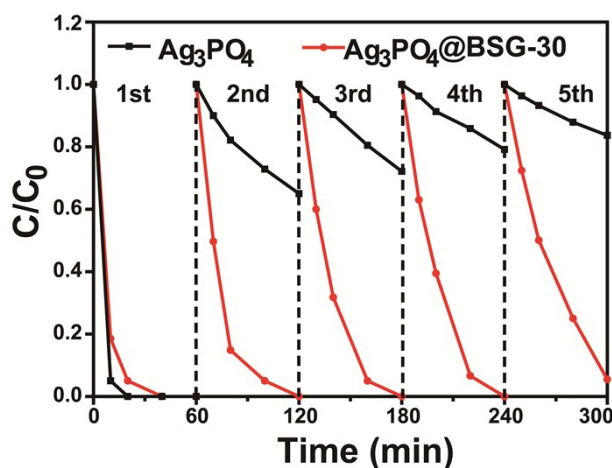

Fig. S2 Photocatalytic stabilities of the bare  $\text{Ag}_3\text{PO}_4$  and the  $\text{Ag}_3\text{PO}_4$ @BSG-30 nanocomposite as photocatalysts for the degradation of methyl orange (4mg/L) under simulated sunlight irradiation .

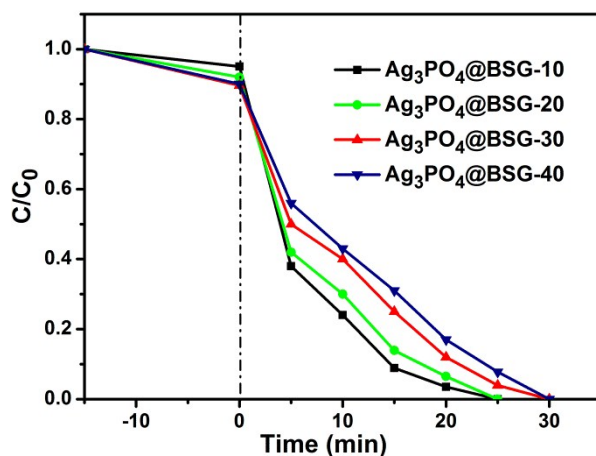

**Fig. S3** Photocatalytic activity of the Ag<sub>3</sub>PO<sub>4</sub>@BSG-X (10, 20, 30, 40) nanocomposites as photocatalysts for the degradation of RhB under visible light irradiation.

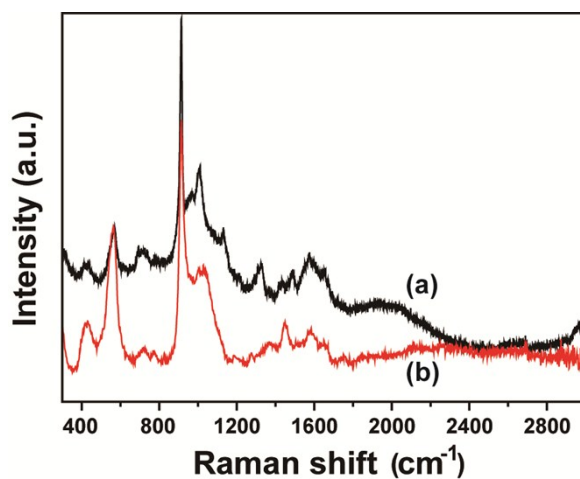

**Fig. S4** Raman spectra of (a) the fresh Ag<sub>3</sub>PO<sub>4</sub>@BSG-30 nanocomposites and (b) after using.
